# Supplementary material
Source: PubMed Central journal article supplement (PMC4023142)

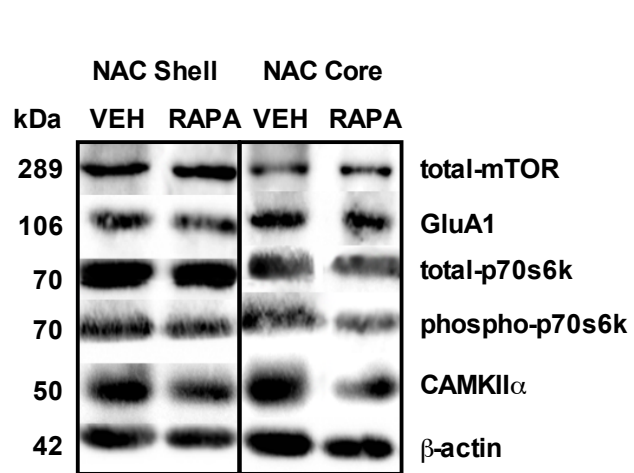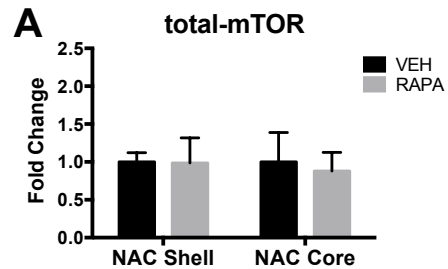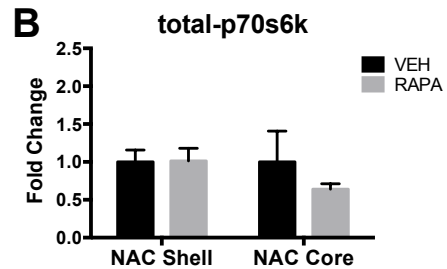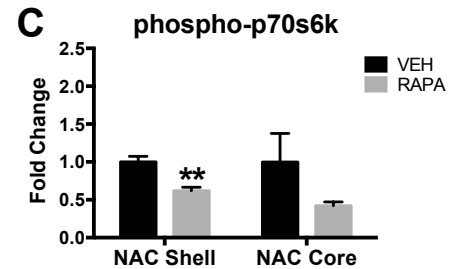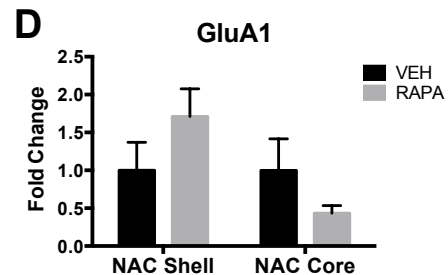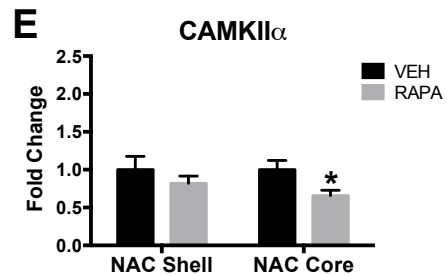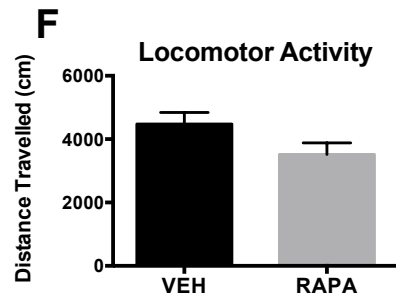

Figure S2

Supplement: npp201416x2.pdf [file npp201416x2.pdf]

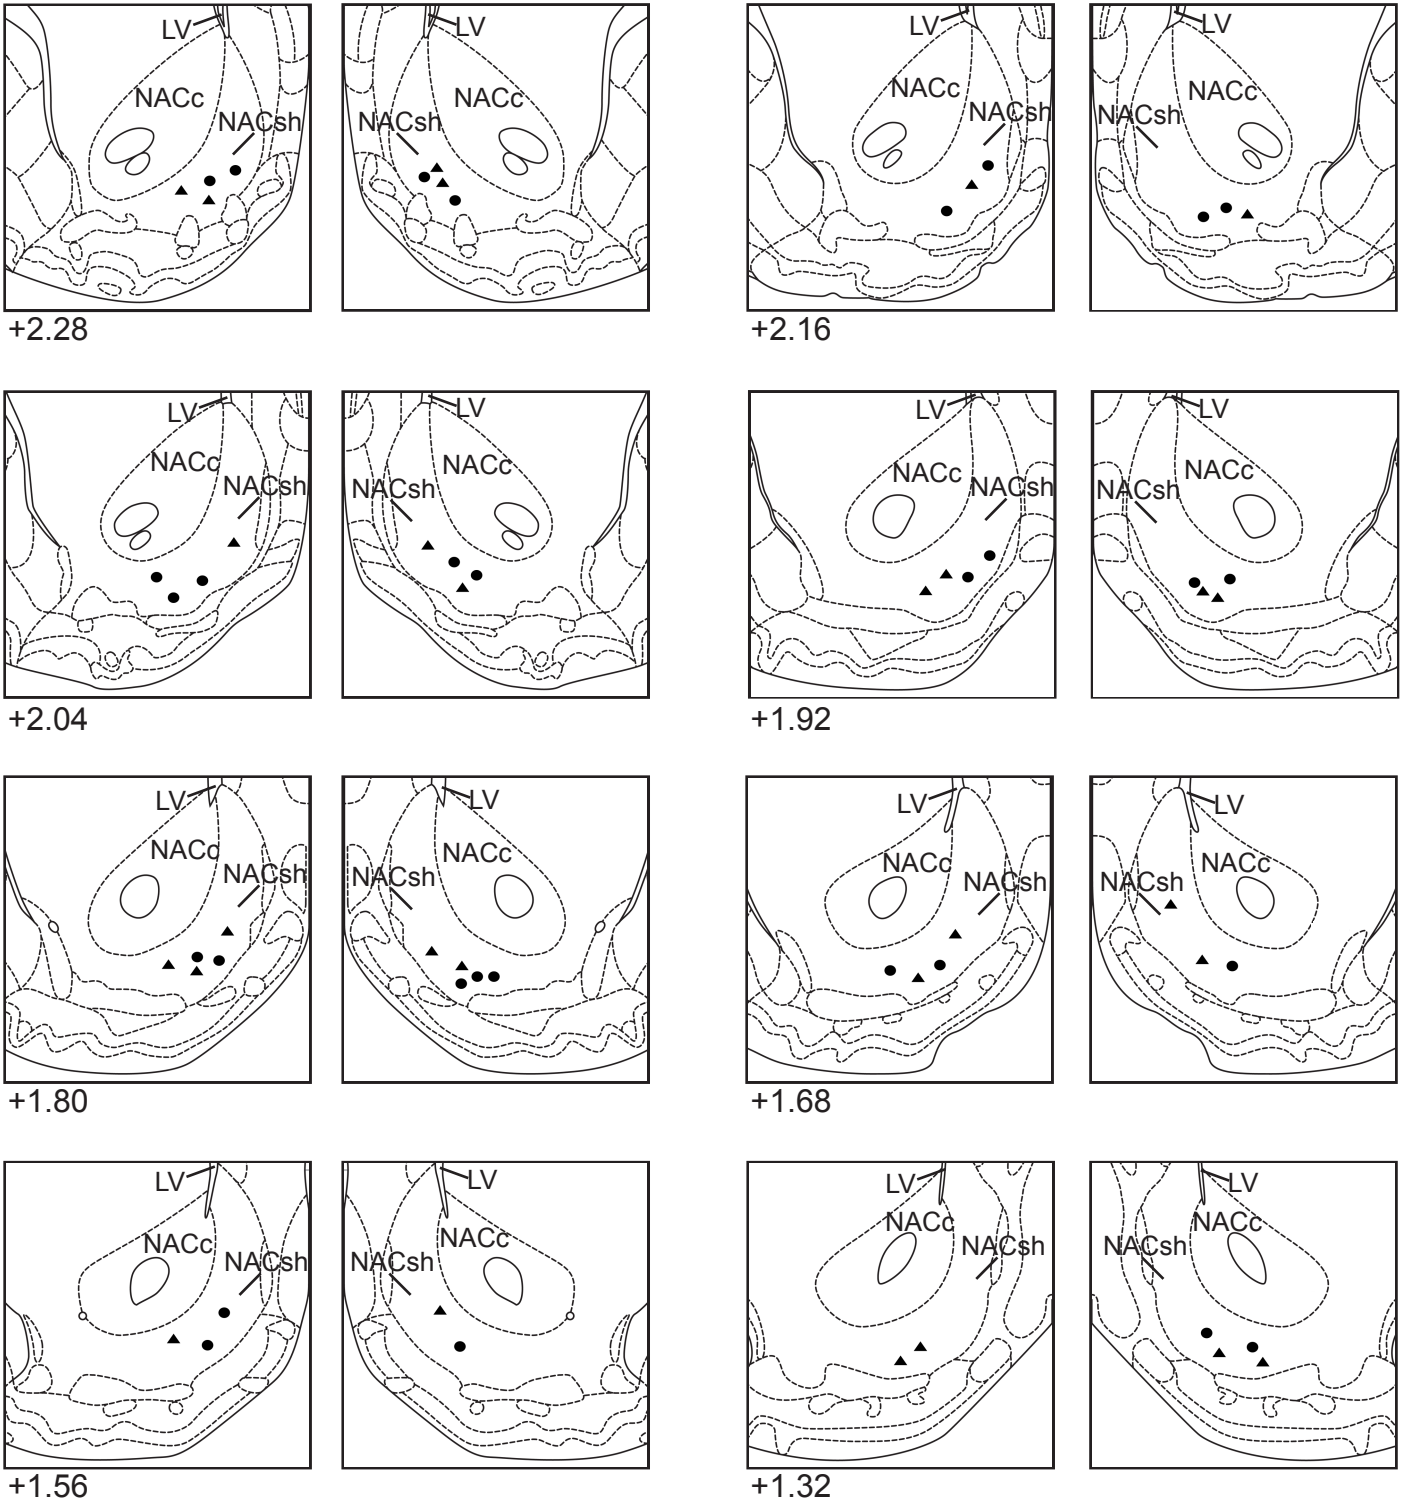

Figure S3-A

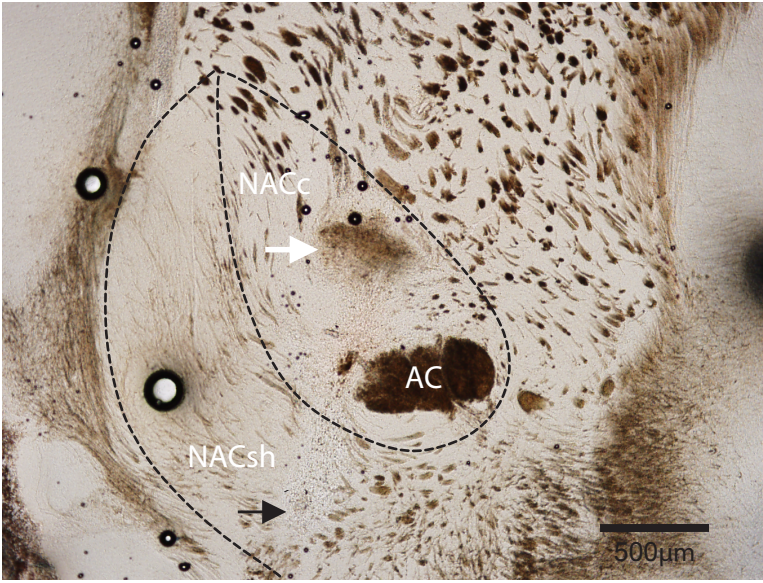

AP: +2.04

Figure S3-B

Supplement: npp201416x3.pdf [file npp201416x3.pdf]

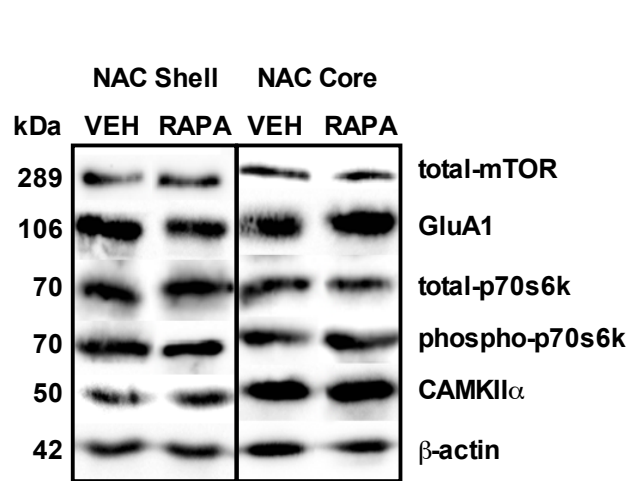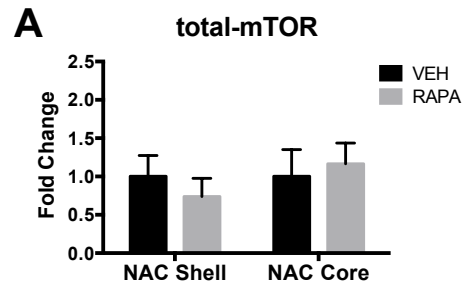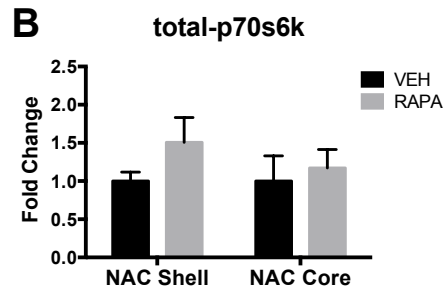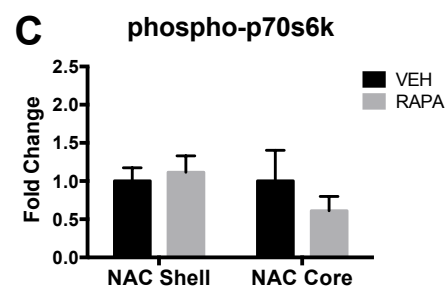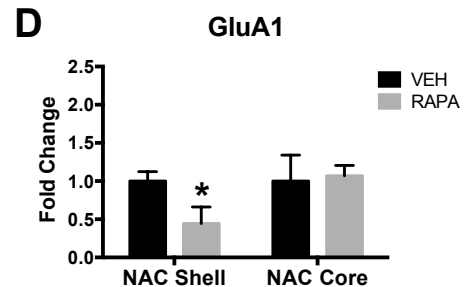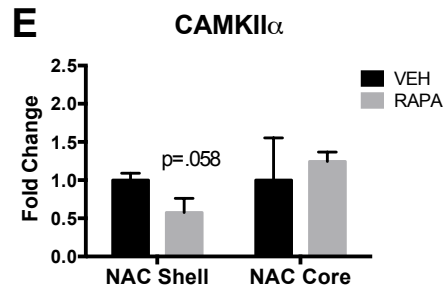

**Figure S4**

Supplement: npp201416x4.pdf [file npp201416x4.pdf]
